# Supplementary material for: A population genetic assessment of coral recovery on highly disturbed reefs of the Keppel Island archipelago in the southern Great Barrier Reef
Source: PeerJ journal article supplement (doi:10.7717/peerj.1092), 2015-07-23

Fig. S1: Genetic diversity in *A. millepora* populations across the GBR: Difference between mean allelic evenness and allelic evenness at each site (A), and mean allelic evenness at each site (B).

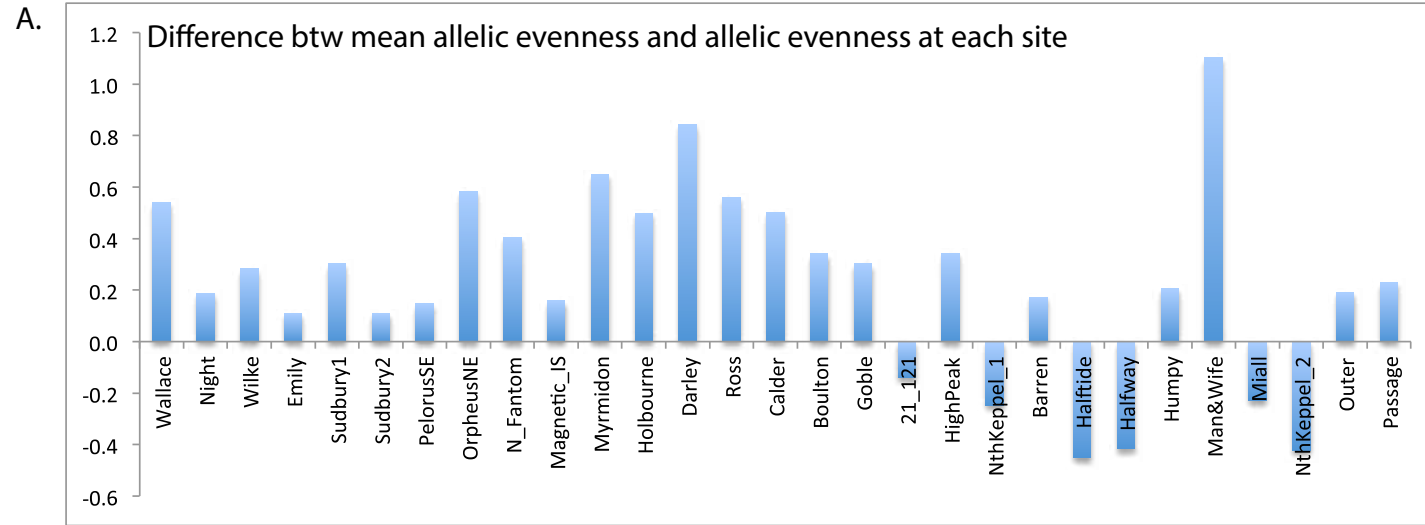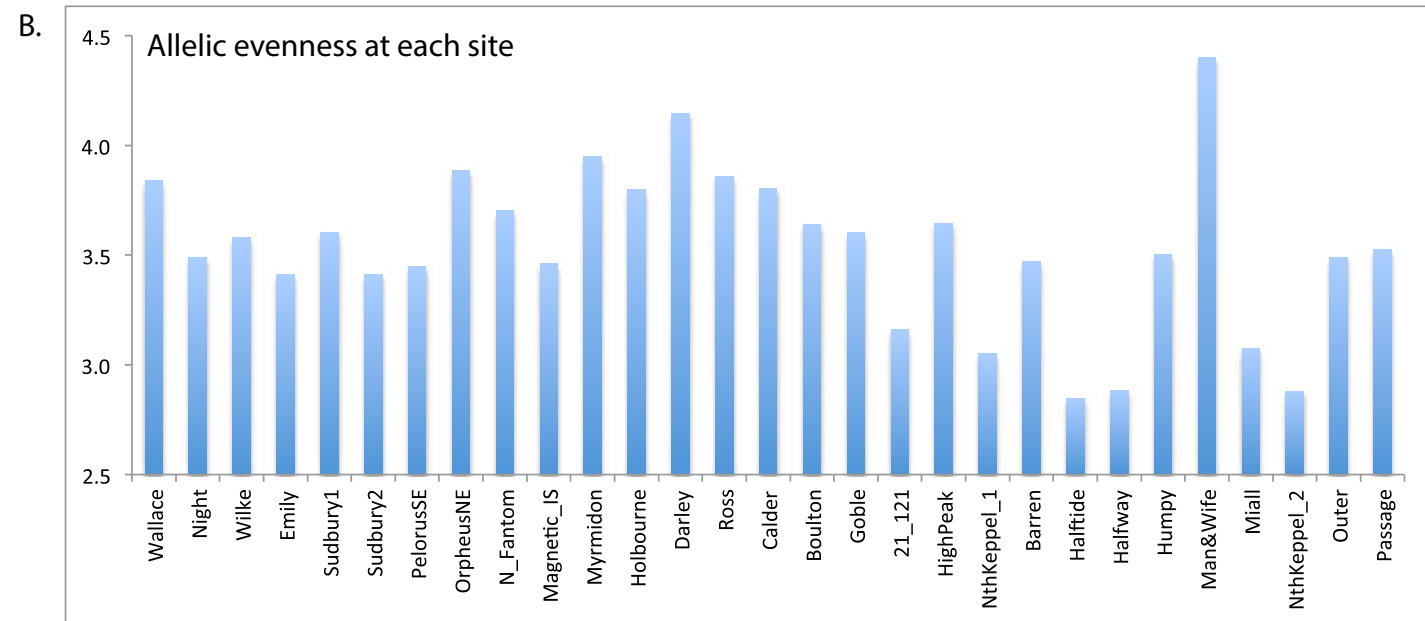

Supplement: Fig_S1.pdf [file Fig_S1.pdf]
