# Supplementary material for: A population genetic assessment of coral recovery on highly disturbed reefs of the Keppel Island archipelago in the southern Great Barrier Reef
Source: PeerJ journal article supplement (doi:10.7717/peerj.1092), 2015-07-23

Fig S3: Isolation by distance analysis (IBD).

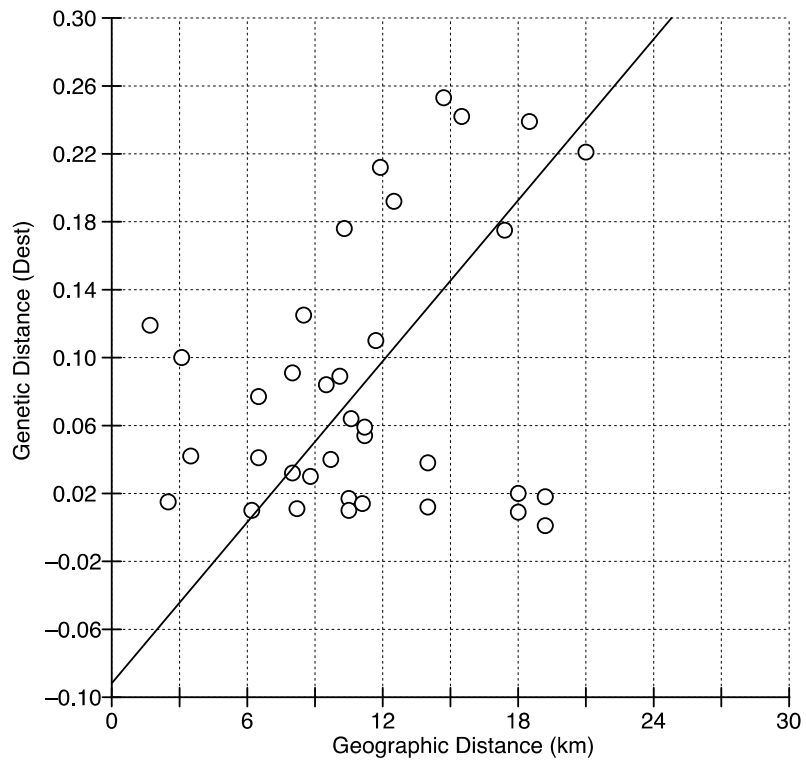

Supplement: Fig_S3.pdf [file Fig_S3.pdf]
