# Supplementary material for: A population genetic assessment of coral recovery on highly disturbed reefs of the Keppel Island archipelago in the southern Great Barrier Reef
Source: PeerJ journal article supplement (doi:10.7717/peerj.1092), 2015-07-23

Fig S5: STRUCTURE (A & C) and TESS (B & D) results of Keppel Island populations for K = 2 (A & B) and K = 3 (C & D).

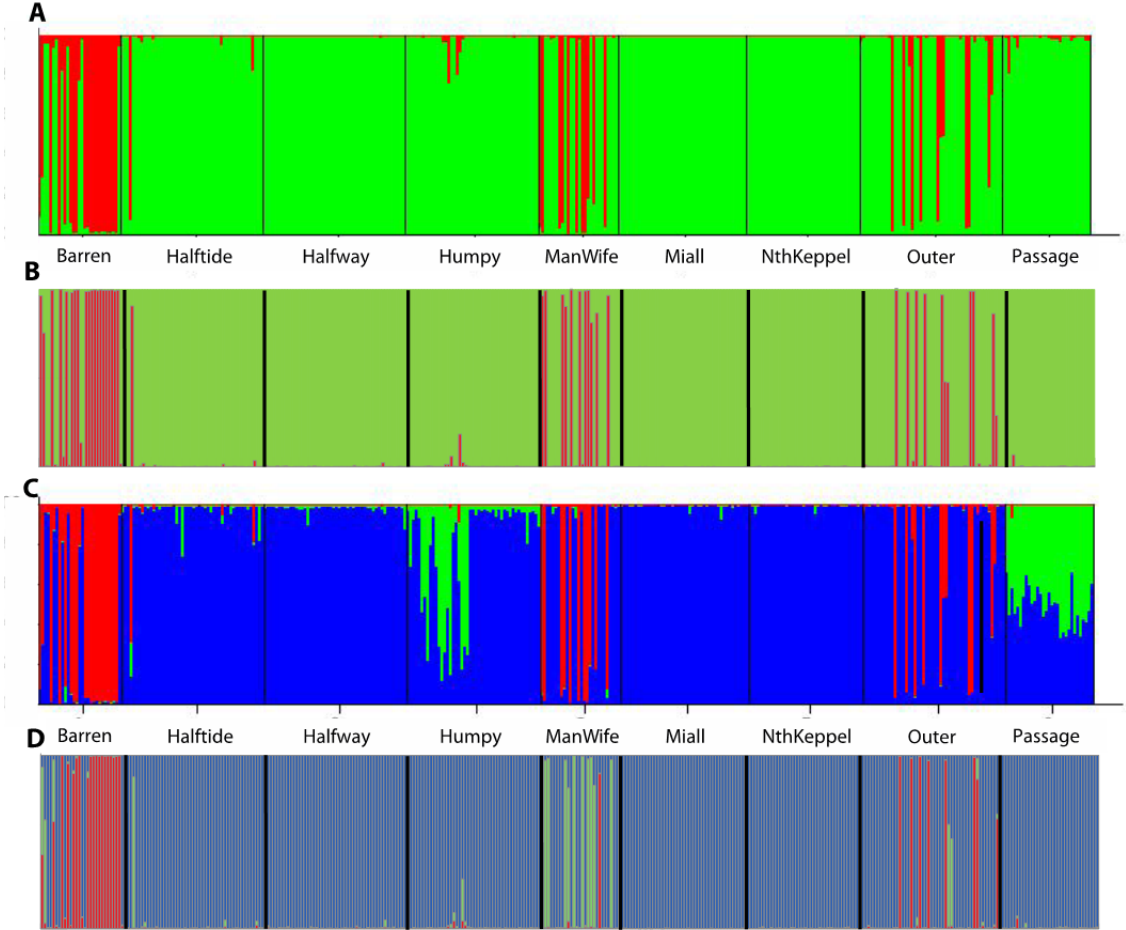

Supplement: Fig_S5.pdf [file Fig_S5.pdf]
